# Supplementary material
Source: publisher figshare collection journal article supplement (https://gsapubs.figshare.com/ndownloader/files/34244228)
Supplement: Supplementary file 1 [file 34244228]

## Sheet: Sheet1
Table S4. Summary of Sr-Nd Isotopes of Intrusions in Longshou Shan area														Wu, C., Li, J., Zuza, A.V., Haproff, P.J., Yin, A., and Ding, L., 2022, Paleoproterozoic–Paleozoic tectonic evolution of the Longshou Shan, western North China craton: Geosphere, v. 18, https://doi.org/10.1130/GES02491.1
Sample	Rock type	T(Ma)	87Rb/86Sr	87Sr/86Sr	147Sm/144Nd	143Nd/144Nd	(87Sr/86Sr) i	(143Nd/144Nd) i	εNd(t)	εNd(0)	TDM(Nd) (Ma)	T2DM(Ma)	Data Sources
THL02-02	granite	330	0.8587	0.712067	0.0931	0.511592	0.708034	0.511391	-16.0555	-20.4043	1963.94	2386.23	S. Xue et al., 2017
THL02-04	granite	330	0.695	0.711293	0.0834	0.511581	0.708029	0.511401	-15.8611	-20.6188	1831.36	2370.57	S. Xue et al., 2017
THL02-06	granite	330	0.7618	0.711675	0.088	0.511572	0.708097	0.511382	-16.2309	-20.7944	1908.78	2400.36	S. Xue et al., 2017
THL06	granite	330	0.7914	0.711589	0.0816	0.511579	0.707872	0.511403	-15.8242	-20.6579	1808.84	2367.59	S. Xue et al., 2017
THL13	granite	330	1.1514	0.713149	0.1008	0.51157	0.707741	0.511352	-16.8098	-20.8334	2126.36	2446.99	S. Xue et al., 2017
THL16	granite	330	0.8186	0.711817	0.0828	0.511576	0.707972	0.511397	-15.9334	-20.7164	1828.79	2376.39	S. Xue et al., 2017
2015H59	granite	422	19.8379	0.816025	0.1462	0.512326	0.6968	0.511922	-3.37262	-6.08617	1857.51	1435.91	L. Q. Zhang et al., 2017
2015H60	granite	422	18.0608	0.782665	0.1575	0.512378	0.6741	0.511943	-2.96702	-5.07181	2088.79	1403.03	L. Q. Zhang et al., 2017
2015H62	granite	422	17.1346	0.799528	0.1814	0.512368	0.6965	0.511867	-4.45214	-5.26687	3662.44	1523.38	L. Q. Zhang et al., 2017
Bu16-1	mafic dyke	424	0.1815	0.706714	0.1275	0.51236	0.705618	0.512006	-1.68178	-5.42293	1396.71	1300.43	J. Duan et al., 2015
Bu17-1	mafic dyke	424	0.2525	0.707786	0.134	0.512383	0.706261	0.512011	-1.5851	-4.97427	1466.36	1292.58	J. Duan et al., 2015
Bu17-2	mafic dyke	424	0.4547	0.708514	0.1353	0.512349	0.705768	0.511973	-2.31954	-5.63751	1556.21	1352.16	J. Duan et al., 2015
JC-16	mafic dyke	424	0.1562	0.708516	0.1143	0.512322	0.707573	0.512005	-1.70807	-6.16419	1269.95	1302.56	J. Duan et al., 2015
JC-29	mafic dyke	424	0.2632	0.708305	0.1049	0.51225	0.706716	0.511959	-2.60435	-7.56869	1261.03	1375.25	J. Duan et al., 2015
JC38-1	mafic dyke	424	0.1898	0.708844	0.1224	0.512272	0.707697	0.511932	-3.12367	-7.13954	1465.07	1417.36	J. Duan et al., 2015
JC38-1R	mafic dyke	424	0.1898	0.708863	0.1224	0.512254	0.707716	0.511914	-3.47517	-7.49067	1494.92	1445.85	J. Duan et al., 2015
JC38-2	mafic dyke	424	0.4384	0.709453	0.1259	0.512206	0.706805	0.511856	-4.60229	-8.427	1636.94	1537.18	J. Duan et al., 2015
17WAL-40	Alkali-feldspar granite	425.6	65.3339	1.03543	0.199882	0.512447	0.63939	0.51189	-3.90845	-3.72583	7598.26	1482.27	Z. Z. Wang et al., 2020
A02	quartz diorite	426	0.2402	0.70848	0.0921	0.512198	0.707	0.511941	-2.89896	-8.58305	1193.67	1400.77	L. Q. Zhang et al., 2017
A03	quartz diorite	426	0.4472	0.71003	0.0861	0.512207	0.7073	0.511967	-2.39633	-8.40749	1127.05	1360.02	L. Q. Zhang et al., 2017
A04	quartz diorite	426	0.4997	0.71027	0.0884	0.5122	0.7072	0.511953	-2.65833	-8.54404	1156.14	1381.26	L. Q. Zhang et al., 2017
A59	quartz diorite	426	0.2857	0.70868	0.0969	0.512198	0.7069	0.511928	-3.16047	-8.58305	1242.53	1421.97	L. Q. Zhang et al., 2017
A17	granodiorite	427	0.304	0.70863	0.099	0.512226	0.7068	0.511949	-2.71561	-8.03686	1228.16	1386.72	L. Q. Zhang et al., 2017
A19	granodiorite	427	0.2839	0.70861	0.0902	0.512204	0.7069	0.511952	-2.66466	-8.46601	1168.01	1382.59	L. Q. Zhang et al., 2017
A20	granodiorite	427	0.3659	0.7095	0.0915	0.512217	0.7073	0.511961	-2.48179	-8.21242	1164.24	1367.76	L. Q. Zhang et al., 2017
ZK-1	syenite	427.2	0.83	0.713215	0.0859	0.512136	0.70799	0.511896	-3.7549	-9.79249	1209.59	1471.13	Z. Q. Zhang et al., 2018
ZK74-1	syenite	427.2	0.82	0.713138	0.0841	0.512142	0.70798	0.511907	-3.53939	-9.67544	1185.83	1453.66	Z. Q. Zhang et al., 2018
2015H49	granodiorite	443	0.3992	0.710202	0.0947	0.512088	0.7077	0.511813	-4.96702	-10.7288	1359.8	1582.19	L. Q. Zhang et al., 2017
2015H51	granodiorite	443	0.4712	0.710996	0.0951	0.512062	0.708	0.511786	-5.49743	-11.236	1397.59	1625.13	L. Q. Zhang et al., 2017
2015H52	granodiorite	443	0.516	0.71076	0.0956	0.512111	0.7075	0.511834	-4.56886	-10.2802	1340.6	1549.94	L. Q. Zhang et al., 2017
WC09-17-2014(2b)	granite	470	1.71043	0.738281	0.102111	0.511391	0.726094	0.511077	-18.6729	-24.3252	2392.81	2709.74	This study
AZ09-16-2014(10)	leucogranite	1882	2.33176	0.782765	0.109967	0.511479	0.768817	0.510117	-1.68761	-22.6085	2444.91	2492.07	This study
1	granite	2233	3.35822	0.746983	0.1066	0.511818	0.746983	0.51025	9.88704	-15.9957	1891.36	1850.61	Y. Liu, 2008
2	granite	2233	2.40612	0.723481	0.09301	0.511994	0.723481	0.510626	17.2617	-12.5625	1458.85	1256.05	Y. Liu, 2008
5	granite	2233	3.89588	0.74535	0.1032	0.511826	0.74535	0.510308	11.0252	-15.8396	1822.57	1759	Y. Liu, 2008
6	granite	2233	2.78697	0.741735	0.1082	0.511827	0.741735	0.510235	9.60185	-15.8201	1906.98	1873.56	Y. Liu, 2008
11	granite	2233	8.38717	0.901252	0.09386	0.511112	0.901252	0.509731	-0.286304	-29.7676	2579.7	2667.03	Y. Liu, 2008
15	granite	2233	3.09854	0.745352	0.1101	0.511824	0.745352	0.510204	8.99467	-15.8787	1946.11	1922.4	Y. Liu, 2008
17	granite	2233	2.80198	0.744386	0.1038	0.511816	0.744386	0.510289	10.6559	-16.0347	1846.21	1788.74	Y. Liu, 2008
18	granite	2233	2.12417	0.771764	0.0931	0.511083	0.771764	0.509713	-0.635884	-30.3333	2599.73	2695	Y. Liu, 2008
19	granite	2233	0.647308	0.716025	0.1233	0.512382	0.716025	0.510568	16.1319	-4.99378	1295.21	1347.29	Y. Liu, 2008
22	granite	2233	3.38503	0.74378	0.1192	0.511868	0.74378	0.510114	7.23164	-15.0203	2061.98	2064.13	Y. Liu, 2008
